# Supplementary material for: Integrating activated carbon into conventional sand filtration boosts biological Mn(ii) removal efficiency
Source: Royal Society of Chemistry journal article supplement (doi:10.1039/d5ew00344j), 2025-01-01
Supplement: d5ew00344j1.pdf [file d5ew00344j1.pdf]

## Supporting information for

### Integrating Activated Carbon into Conventional Sand Filtration Boosts

#### Biological Mn(II) Removal Efficiency

Qi Chen<sup>1,3</sup>, Bin Wu<sup>2</sup>, Yuliang Su<sup>2</sup>, Huidong Shen<sup>2</sup>, Guohang Han<sup>2</sup>, Shengtao Chen<sup>2</sup>,

Baoyou Shi<sup>1,4</sup>, Guiwei Li<sup>1, \*</sup>

<sup>1</sup>Key Laboratory of Drinking Water Science and Technology, Research Center for Eco-Environmental Sciences, Chinese Academy of Sciences, Beijing 100085, China.

<sup>2</sup>Zhuhai Water Environment Holdings Group Ltd., Zhuhai, Guangdong 519020, China

<sup>3</sup>Hunan Engineering Research Center of Water Security Technology and Application, College of Civil Engineering, Hunan University, Changsha 410082, China

<sup>4</sup>University of Chinese Academy of Sciences, Beijing 100049, China.

\*Corresponding author: [gwli@rcees.ac.cn](mailto:gwli@rcees.ac.cn)

Tel: +86-156 5229 1652

This file includes supplementary text, tables, and figures:

- 11 pages
- 2 parts of supplementary text
- 1 table
- 7 figures

**Submitted to *Environmental Science: Water Research & Technology***

## Table of contents

|                                                                                                                                                     |    |
|-----------------------------------------------------------------------------------------------------------------------------------------------------|----|
| Text S1 Water Sample Collection and Analysis .....                                                                                                  | 3  |
| Text S2 Information of Primers .....                                                                                                                | 3  |
| Table S1 Water quality data for reservoir water and air flotation pool effluent .....                                                               | 4  |
| Figure S1. The model diagram of different filtration columns. ....                                                                                  | 5  |
| Figure S2. The quality of MnO <sub>x</sub> enriched by different filter columns. ....                                                               | 6  |
| Figure S3. The relative abundance of bacteria in the top and bottom layers of<br>different filter columns. ....                                     | 7  |
| Figure S4. Venn diagram of bacterial community of different biofilm samples<br>collected from the top and bottom layers of different columns. ....  | 8  |
| Figure S5. The difference in the abundance of the 30 most abundant bacteria in the<br>top and bottom layers of the sand column. ....                | 9  |
| Figure S6. The difference in the abundance of the 30 most abundant bacteria in the<br>top and bottom layers of the ¼ GAC-¾ sand filter column. .... | 10 |
| Figure S7. The difference in the abundance of the 30 most abundant bacteria in the<br>top and bottom layers of the ½ GAC-½ sand filter column. .... | 11 |

### **Text S1 Water Sample Collection and Analysis**

The water samples were collected from the bottom effluent water of the filter columns during the first 2 hours of the daily flow state. Water samples were filtered through 0.22- $\mu$ m polyethersulfone membrane and the filtrate was then acidized with nitric acid to achieve a HNO<sub>3</sub> concentration of 1% (w/w). All water samples to be measured in this experiment were stored in 15 mL polypropylene centrifuge tubes, and acidified for at least 24 h before analysis. The inductively coupled plasma mass spectrometry (ICP-MS, Agilent Technologies 7900) was used to analyze the dissolved Mn (assumed to be Mn(II)) concentration in the filtrate. A HQ2100 Portable Multi-Meter (Hach, USA) was used to measure the pH and dissolved oxygen of water samples.

### **Text S2 Information of Primers**

The primer pair 338F and 806R is used for the amplification of the bacterial 16S rRNA gene. The 338F primer has the sequence 5'-ACTCCTACGGGAGGCAGCAG-3', a length of 20 nucleotides, and a melting temperature ( $T_m$ ) of approximately 60-62°C, specifically targeting the V3 region of the 16S rRNA gene. The 806R primer, with the sequence 5'-GGACTACHVGGGTWTCTAAT-3', is also 20 nucleotides long, with a  $T_m$  of about 55-57°C, designed to amplify the V4 region. This primer pair is widely used in 16S rRNA gene sequencing of microbial communities, aiding in the study of community structure and diversity.

**Table S1 Water quality data for raw water and air flotation pool effluent used for the filtration experiments.**

| Parameters               | Source water   | effluent water of air flotation |
|--------------------------|----------------|---------------------------------|
| Dissolved organic carbon | 1.0 ~ 3.0 mg/L | 1.0 ~ 2.0 mg/L                  |
| Dissolved oxygen         | 7.6 ~ 8.7 mg/L | 7.9 ~ 10.7 mg/L                 |
| Total manganese          | 10 ~ 20 µg/L   | 10 ~ 20 µg/L                    |
| Dissolved manganese      | 5 ~ 10 µg/L    | 3 ~ 10 µg/L                     |
| pH                       | 7.6 ~ 7.8      | 7.5 ~ 7.9                       |
| Total iron               | 10 ~ 100 µg/L  | 20 ~ 35 µg/L                    |
| Dissolved iron           | 10 ~ 20 µg/L   | < 10 µg/L                       |
| Total aluminum           | 200 µg/L       | 90 ~ 150 µg/L                   |
| Dissolved aluminum       | 10 ~ 50 µg/L   | 5 ~ 30 µg/L                     |
| Temperature              | 25 ~ 35 °C     | 22 ~ 30 °C                      |

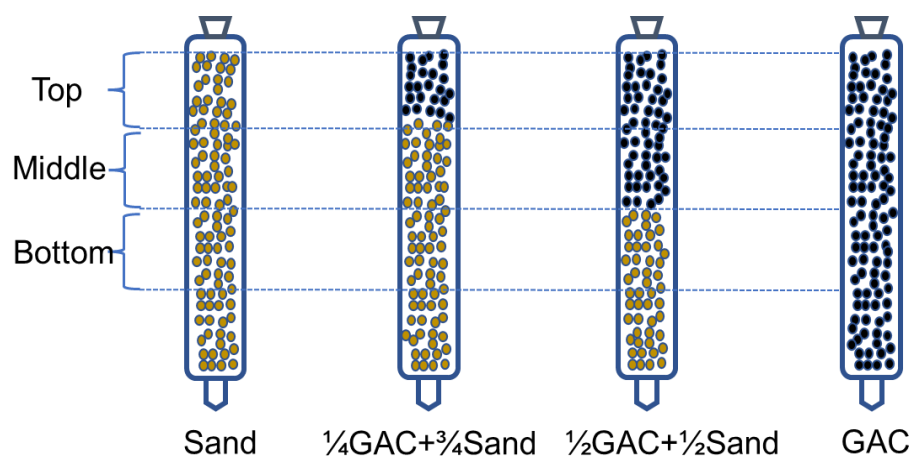

**Figure S1.** The model diagram of different filtration columns.

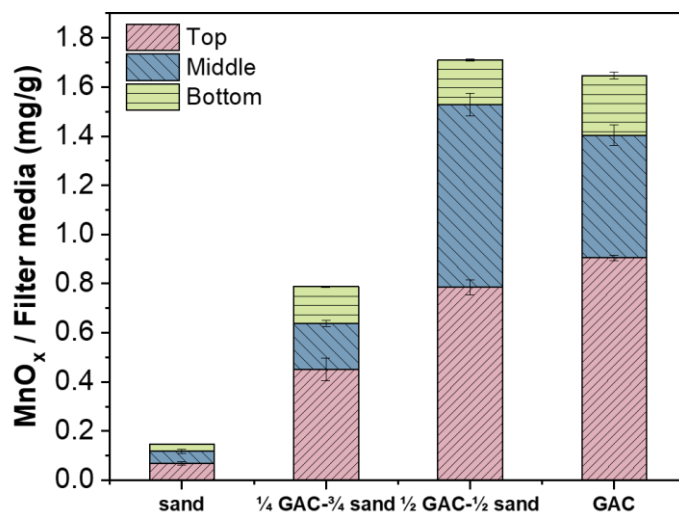

**Figure S2.** The quality of MnO<sub>x</sub> enriched by different filter columns.

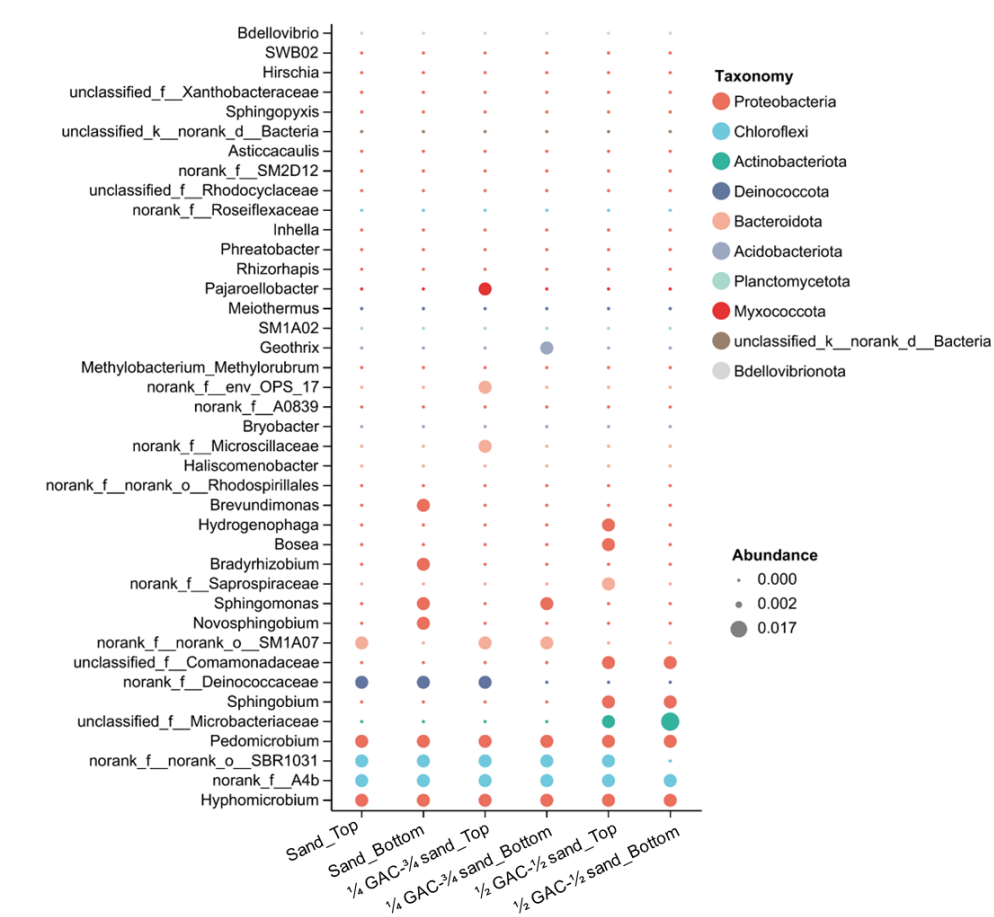

**Figure S3.** The relative abundance of bacteria in the top and bottom layers of different filter columns.

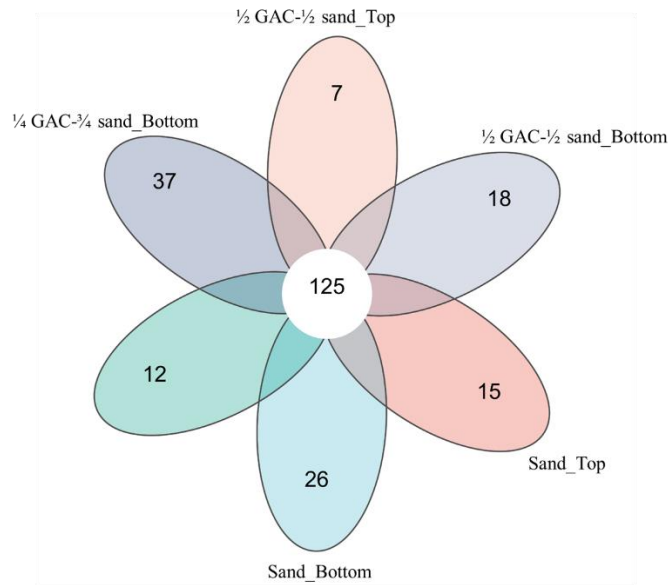

**Figure S4.** Venn diagram of bacterial community of different biofilm samples collected from the top and bottom layers of different columns.



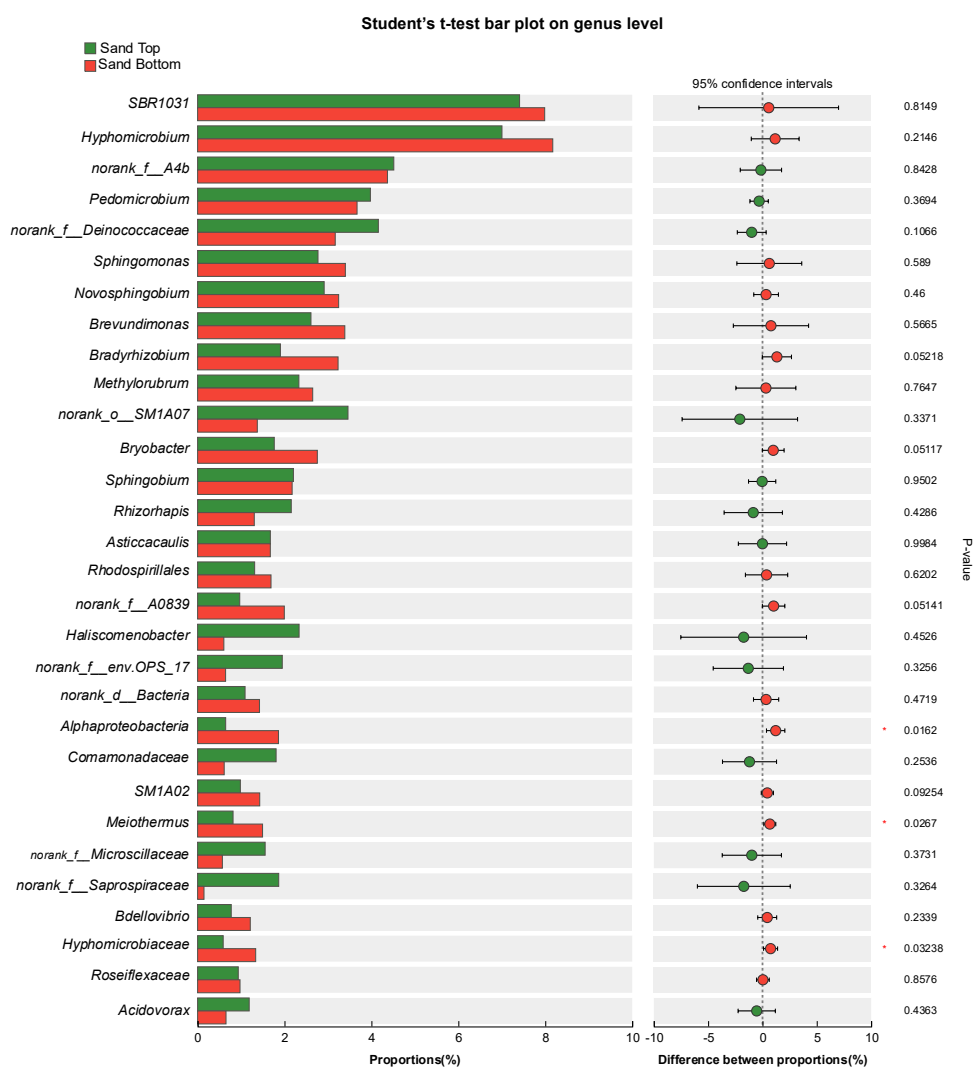

**Figure S5.** The difference in the abundance of the 30 most abundant bacteria in the top and bottom layers of the sand column.

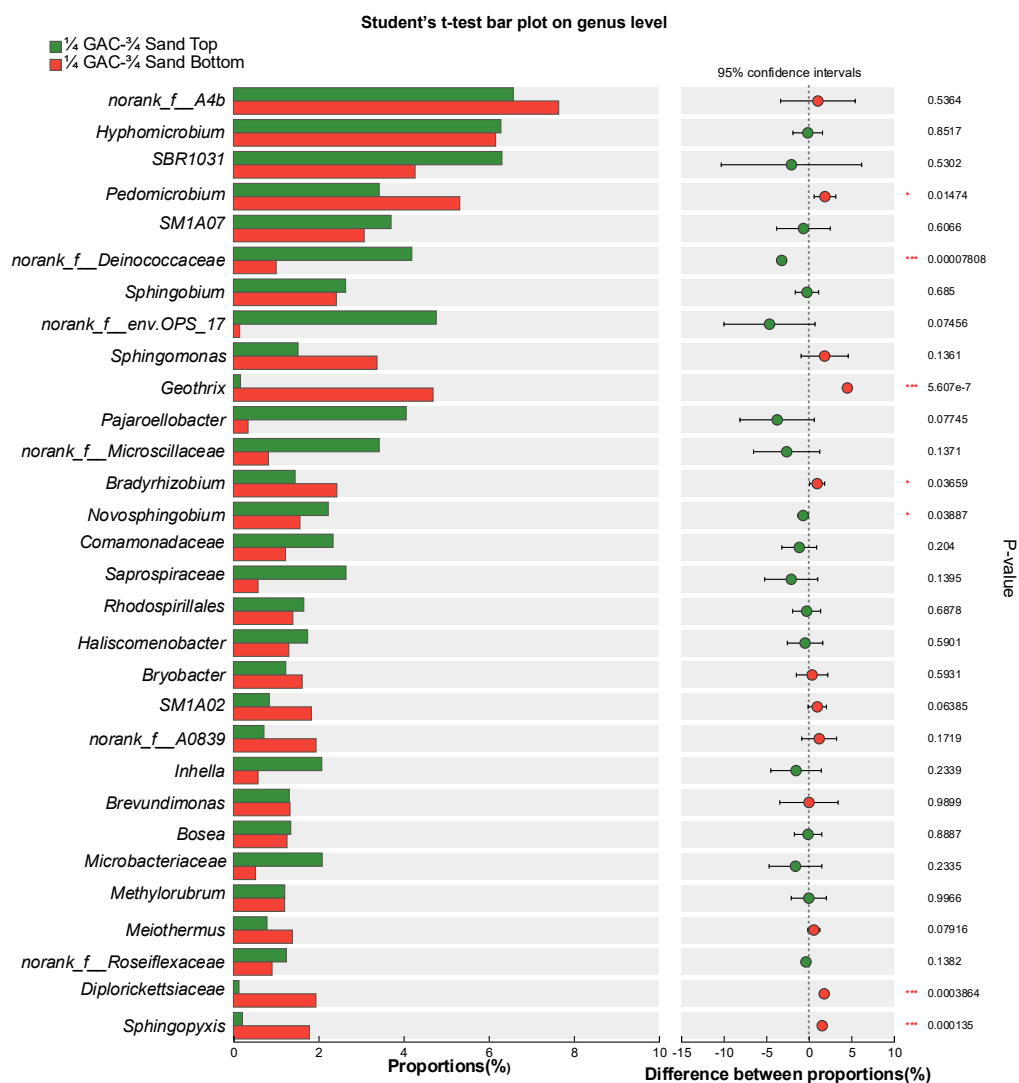

**Figure S6.** The difference in the abundance of the 30 most abundant bacteria in the top and bottom layers of the 1/4 GAC-3/4 sand filter column.

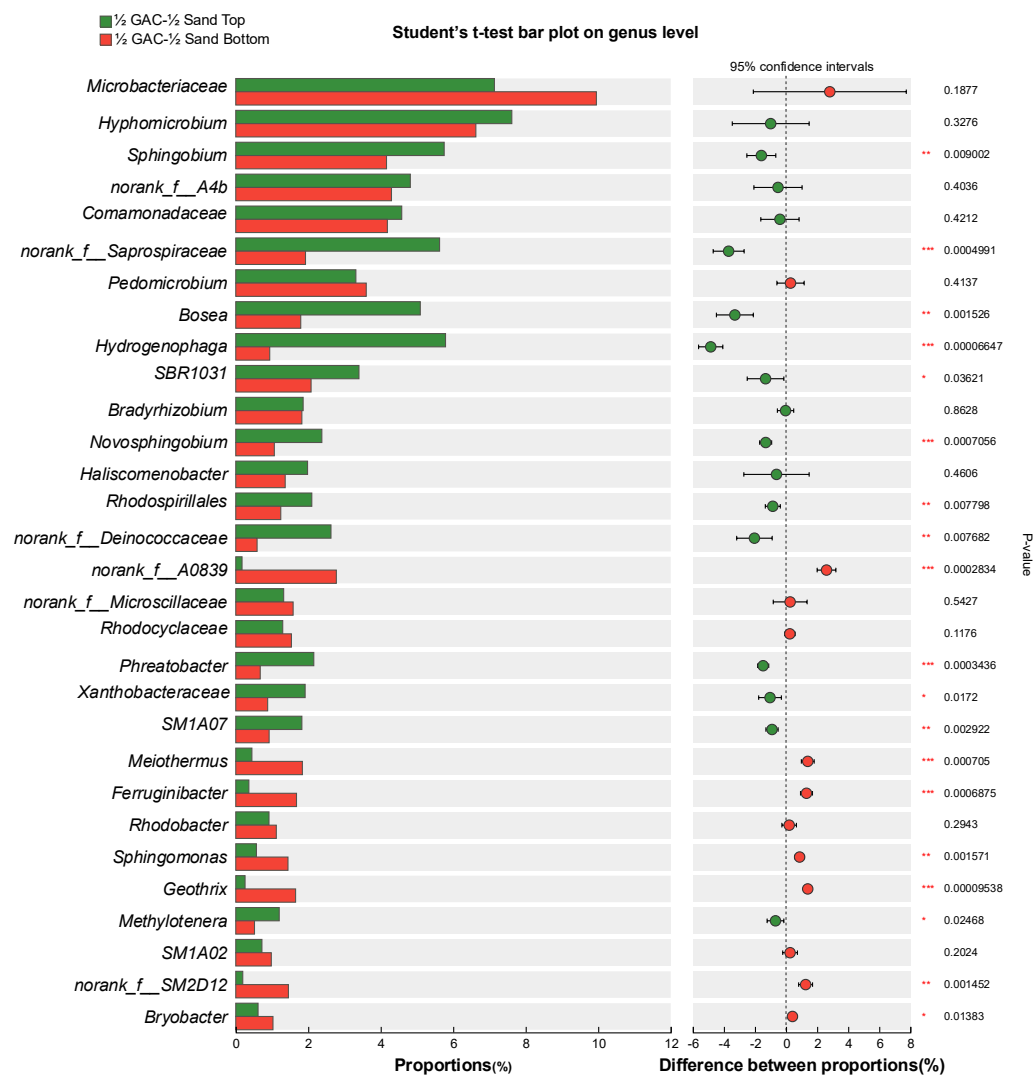

**Figure S7.** The difference in the abundance of the 30 most abundant bacteria in the top and bottom layers of the ½ GAC-½ sand filter column.
